# Supplementary material for: MatterChat: A Multi-Modal LLM for Material Science
Source: Research Square preprint supplement (doi:10.21203/rs.3.rs-6373794/v1), 2025-05-20
Supplement: Supplementary file 1 [file db22a3dc8977bd50f0e447fc.pdf]

# Supplementary Information:A Multimodal Framework for Material Discovery: Infusing Large Language Models with Atomic Structures

Yingheng Tang<sup>1\*</sup>, Wenbin Xu<sup>2\*</sup>, Jie Cao<sup>4</sup>, Jianzhu Ma<sup>3</sup>,  
Weilu Gao<sup>5\*</sup>, Steve Farrell<sup>2</sup>, Benjamin Erichson<sup>6,7</sup>,  
Michael W. Mahoney<sup>6,7,8</sup>, Andy Nonaka<sup>1</sup>, Zhi Yao<sup>1\*</sup>

<sup>1</sup>Applied Mathematics and Computational Research Division, Lawrence  
Berkeley National Laboratory, Berkeley, CA, USA.

<sup>2</sup>National Energy Research Scientific Computing Center, Lawrence  
Berkeley National Laboratory, Berkeley, CA, USA.

<sup>3</sup>Institute for AI Industry Research, Tsinghua University, Beijing, China.

<sup>4</sup>NSF National AI Institute for Student-AI Teaming, University of  
Colorado at Boulder, Boulder, USA.

<sup>5</sup>Department of Electrical and Computer Engineering, The University of  
Utah, Salt Lake City, UT, USA.

<sup>6</sup>Scientific Data Division, Lawrence Berkeley National Laboratory,  
Berkeley, CA, USA.

<sup>7</sup>International Computer Science Institute, Berkeley, CA, USA.

<sup>8</sup>Department of Statistics, University of California at Berkeley, Berkeley,  
CA, USA.

\*Corresponding author(s). E-mail(s): [ytang4@lbl.gov](mailto:ytang4@lbl.gov);  
[wenbinxu@lbl.gov](mailto:wenbinxu@lbl.gov); [weilugao@utah.edu](mailto:weilugao@utah.edu); [jackie\\_zhiyao@lbl.gov](mailto:jackie_zhiyao@lbl.gov);

**Keywords:** Foundational model, Large Language Model, multi-modal learning,  
Material discovery

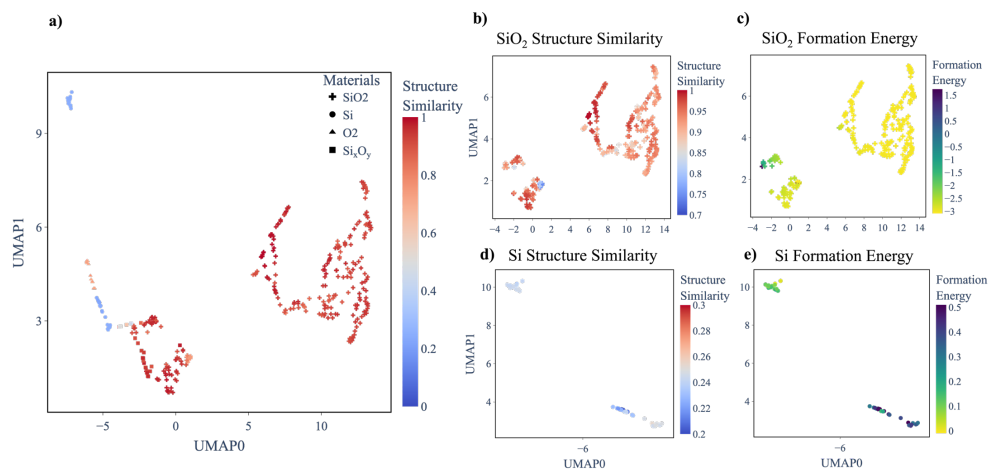

**Fig. 1** UMAP visualization of structural embeddings extracted from the bridge model. ( $Si$ ,  $O$ ,  $Si_xO_y$ )

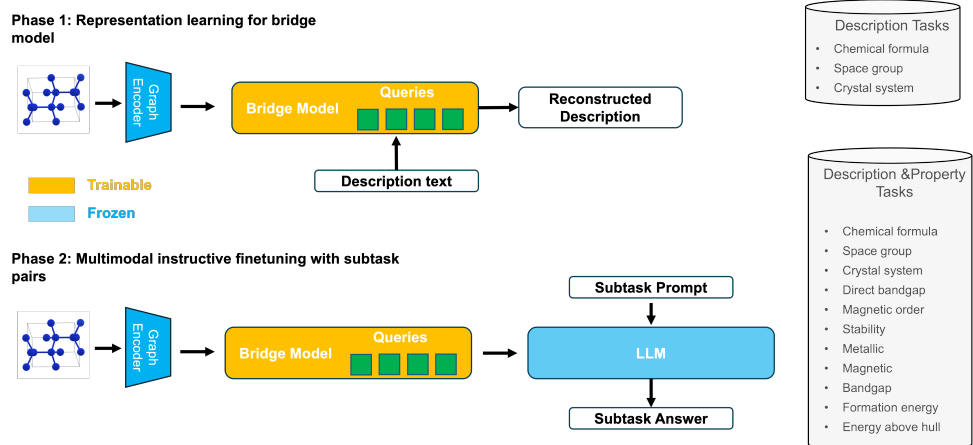

**Fig. 2** Training Scheme.

## Instruction Templates (descriptive tasks)

| Task                   | Instruction Template                                                                                                                                                                                                                                                                                                                                                                                                                                                                                                                                                                                                                                                                                                                                                                                                                                                                         |
|------------------------|----------------------------------------------------------------------------------------------------------------------------------------------------------------------------------------------------------------------------------------------------------------------------------------------------------------------------------------------------------------------------------------------------------------------------------------------------------------------------------------------------------------------------------------------------------------------------------------------------------------------------------------------------------------------------------------------------------------------------------------------------------------------------------------------------------------------------------------------------------------------------------------------|
| <b>Reduced Formula</b> | <p>&lt;material structure&gt;What is the chemical formula for this material?</p> <p>&lt;material structure&gt;Can you tell me the chemical formula of this material?</p> <p>&lt;material structure&gt;Please provide the chemical formula for the material.</p> <p>&lt;material structure&gt;What is the formula for this material?</p> <p>&lt;material structure&gt;Could you tell me the formula of the material?</p> <p>&lt;material structure&gt;What elements make up this material?</p> <p>&lt;material structure&gt;How would you write the chemical formula of this material?</p> <p>&lt;material structure&gt;What is the exact chemical formula of this material?</p> <p>&lt;material structure&gt;Can you provide the chemical formula for this material?</p>                                                                                                                     |
| <b>Space Group</b>     | <p>&lt;material structure&gt;What is the space group for this material?</p> <p>&lt;material structure&gt;To which space group does this material belong?</p> <p>&lt;material structure&gt;Can you tell me the space group of this material?</p> <p>&lt;material structure&gt;Please provide the space group for the material.</p> <p>&lt;material structure&gt;What is the crystallographic space group of this material?</p> <p>&lt;material structure&gt;How is the space group of this material classified?</p> <p>&lt;material structure&gt;Can you specify the space group for this material?</p> <p>&lt;material structure&gt;Could you tell me the space group classification of this material?</p> <p>&lt;material structure&gt;Can you provide the space group information for this material?</p> <p>&lt;material structure&gt;What is the space group number of this material?</p> |
| <b>Crystal System</b>  | <p>&lt;material structure&gt;What is the crystal system of this material?</p> <p>&lt;material structure&gt;Can you tell me the crystal system of this material?</p> <p>&lt;material structure&gt;Please provide the crystal system for the material.</p> <p>&lt;material structure&gt;What crystal system does this material belong to?</p> <p>&lt;material structure&gt;How is the crystal system of this material classified?</p> <p>&lt;material structure&gt;Can you specify the crystal system for this material?</p> <p>&lt;material structure&gt;What is the crystallographic system of this material?</p> <p>&lt;material structure&gt;Could you tell me the crystal system classification of this material?</p> <p>&lt;material structure&gt;Which crystallographic system does this material belong to?</p>                                                                        |
| <b>Generate</b>        | <p>&lt;material structure&gt;Can you provide another material similar to this material?</p> <p>&lt;material structure&gt;Is there another material like this material that you can provide?</p> <p>&lt;material structure&gt;Can you show me a different material similar to this one?</p> <p>&lt;material structure&gt;Can you generate another material similar to this one?</p>                                                                                                                                                                                                                                                                                                                                                                                                                                                                                                           |
| <b>General</b>         | <p>&lt;material structure&gt;Can you describe this material?</p> <p>&lt;material structure&gt;&lt;s&gt;</p>                                                                                                                                                                                                                                                                                                                                                                                                                                                                                                                                                                                                                                                                                                                                                                                  |

## Answer Templates (descriptive tasks)

| Task                   | Instruction Template                                                                                                                                                                                                                                                                                                                                                                                                                                                                                                                                                                                                                                                                                                                                                                                                                  |
|------------------------|---------------------------------------------------------------------------------------------------------------------------------------------------------------------------------------------------------------------------------------------------------------------------------------------------------------------------------------------------------------------------------------------------------------------------------------------------------------------------------------------------------------------------------------------------------------------------------------------------------------------------------------------------------------------------------------------------------------------------------------------------------------------------------------------------------------------------------------|
| <b>Reduced Formula</b> | <p>The chemical formula for this material is &lt;material attribute &gt;.</p> <p>The chemical formula of this material is &lt;material attribute &gt;.</p> <p>The chemical formula for the material is &lt;material attribute &gt;.</p> <p>The formula for this material is &lt;material attribute &gt;.</p> <p>The formula of the material is &lt;material attribute &gt;.</p> <p>The elements that make up this material are represented as &lt;material attribute &gt;.</p> <p>The chemical formula of this material is written as &lt;material attribute &gt;.</p> <p>The exact chemical formula of this material is &lt;material attribute &gt;.</p> <p>The chemical formula for this material is &lt;material attribute &gt;.</p>                                                                                               |
| <b>Space Group</b>     | <p>The space group for this material is &lt;material attribute &gt;.</p> <p>This material belongs to the space group &lt;material attribute &gt;.</p> <p>The space group of this material is &lt;material attribute &gt;.</p> <p>The space group for the material is &lt;material attribute &gt;.</p> <p>The crystallographic space group of this material is &lt;material attribute &gt;.</p> <p>The space group of this material is classified as &lt;material attribute &gt;.</p> <p>The space group for this material is specified as &lt;material attribute &gt;.</p> <p>The space group classification of this material is &lt;material attribute &gt;.</p> <p>The space group information for this material is &lt;material attribute &gt;.</p> <p>The space group number of this material is &lt;material attribute &gt;.</p> |
| <b>Crystal System</b>  | <p>The crystal system of this material is &lt;material attribute &gt;.</p> <p>The crystal system of this material is &lt;material attribute &gt;.</p> <p>The crystal system for the material is &lt;material attribute &gt;.</p> <p>This material belongs to the &lt;material attribute &gt; crystal system.</p> <p>The crystal system of this material is classified as &lt;material attribute &gt;.</p> <p>The crystal system for this material is specified as &lt;material attribute &gt;.</p> <p>The crystallographic system of this material is &lt;material attribute &gt;.</p> <p>The crystal system classification of this material is &lt;material attribute &gt;.</p> <p>This material belongs to the &lt;material attribute &gt; crystallographic system.</p>                                                             |

## Instruction Templates (property part1)

| Task                            | Instruction Template                                                                                                                                                                                                                                                                                                                                                                                                                                                                                                                                                                                                                                                                                                                                                                                                                                                                                                                                                     |
|---------------------------------|--------------------------------------------------------------------------------------------------------------------------------------------------------------------------------------------------------------------------------------------------------------------------------------------------------------------------------------------------------------------------------------------------------------------------------------------------------------------------------------------------------------------------------------------------------------------------------------------------------------------------------------------------------------------------------------------------------------------------------------------------------------------------------------------------------------------------------------------------------------------------------------------------------------------------------------------------------------------------|
| <b>Is Metal</b>                 | <p>&lt;material structure&gt;Is this material metal or non-metal?</p> <p>&lt;material structure&gt;Can you tell me if this material is metal or not?</p> <p>&lt;material structure&gt;What is the classification of this material: metal or non-metal?</p> <p>&lt;material structure&gt;Is this material considered a metal?</p> <p>&lt;material structure&gt;How is this material categorized: metal or non-metal?</p> <p>&lt;material structure&gt;Could you specify if this material is metal or non-metal?</p> <p>&lt;material structure&gt;Is the material metallic or non-metallic?</p> <p>&lt;material structure&gt;Can you provide the classification of this material: metal or non-metal?</p> <p>&lt;material structure&gt;Is this material identified as a metal or non-metal?</p> <p>&lt;material structure&gt;What type of material is this: metal or non-metal?</p>                                                                                        |
| <b>Direct Bandgap</b>           | <p>&lt;material structure&gt;Does the material have a direct bandgap or indirect bandgap?</p> <p>&lt;material structure&gt;Is the bandgap of this material direct or indirect?</p> <p>&lt;material structure&gt;Can you tell me if this material has a direct or indirect bandgap?</p> <p>&lt;material structure&gt;What type of bandgap does this material have: direct or indirect?</p> <p>&lt;material structure&gt;Is this material characterized by a direct or indirect bandgap?</p> <p>&lt;material structure&gt;Could you specify if the bandgap of this material is direct or indirect?</p> <p>&lt;material structure&gt;Does this material exhibit a direct or indirect bandgap?</p> <p>&lt;material structure&gt;Is the bandgap in this material direct or indirect?</p> <p>&lt;material structure&gt;How is the bandgap of this material classified: direct or indirect?</p> <p>&lt;material structure&gt;Is this a direct or indirect bandgap material?</p> |
| <b>Stability</b>                | <p>&lt;material structure&gt;Is this material stable?</p> <p>&lt;material structure&gt;Can you tell me if this material is stable?</p> <p>&lt;material structure&gt;What is the stability of this material?</p> <p>&lt;material structure&gt;Please provide the stability information for this material.</p> <p>&lt;material structure&gt;Is the material stable under standard conditions?</p> <p>&lt;material structure&gt;Is this material thermodynamically stable?</p>                                                                                                                                                                                                                                                                                                                                                                                                                                                                                              |
| <b>Experimental Observation</b> | <p>&lt;material structure&gt;Is the material experimentally observed or not?</p> <p>&lt;material structure&gt;Can you tell me if the material is observed in experiments?</p>                                                                                                                                                                                                                                                                                                                                                                                                                                                                                                                                                                                                                                                                                                                                                                                            |
| <b>Is Magnetic</b>              | <p>&lt;material structure&gt;Is the material magnetic or not?</p> <p>&lt;material structure&gt;Is the material magnetic or non-magnetic?</p> <p>&lt;material structure&gt;Can you tell me if this material is magnetic?</p> <p>&lt;material structure&gt;What is the magnetic nature of this material?</p> <p>&lt;material structure&gt;Is this material classified as magnetic?</p> <p>&lt;material structure&gt;Does this material have magnetic properties?</p> <p>&lt;material structure&gt;Is this a magnetic or non-magnetic material?</p>                                                                                                                                                                                                                                                                                                                                                                                                                         |
| <b>Magnetic Order</b>           | <p>&lt;material structure&gt;What is the magnetic order of the material?</p> <p>&lt;material structure&gt;Can you tell me the magnetic order of this material?</p> <p>&lt;material structure&gt;Could you specify the magnetic order of the material?</p> <p>&lt;material structure&gt;What type of magnetic order does this material have?</p> <p>&lt;material structure&gt;Please provide the magnetic ordering of the material.</p> <p>&lt;material structure&gt;What is the magnetic arrangement in this material?</p> <p>&lt;material structure&gt;Could you tell me the type of magnetic order of this material?</p>                                                                                                                                                                                                                                                                                                                                               |

## Answer Templates (property part1)

| Task                            | Instruction Template                                                                                                                                                                                                                                                                                                                                                                                                                                                                                                                                                                                                                                                                                                            |
|---------------------------------|---------------------------------------------------------------------------------------------------------------------------------------------------------------------------------------------------------------------------------------------------------------------------------------------------------------------------------------------------------------------------------------------------------------------------------------------------------------------------------------------------------------------------------------------------------------------------------------------------------------------------------------------------------------------------------------------------------------------------------|
| <b>Is Metal</b>                 | <p>This material is classified as &lt;material attribute &gt;.</p> <p>This material is a &lt;material attribute &gt;.</p> <p>The classification of this material is &lt;material attribute &gt;.</p> <p>This material is considered &lt;material attribute &gt;.</p> <p>This material is categorized as &lt;material attribute &gt;.</p> <p>This material is specified as &lt;material attribute &gt;.</p> <p>This material is &lt;material attribute &gt;.</p> <p>The classification of this material is &lt;material attribute &gt;.</p> <p>This material is identified as &lt;material attribute &gt;.</p> <p>This type of material is &lt;material attribute &gt;.</p>                                                      |
| <b>Direct Bandgap</b>           | <p>The material has a &lt;material attribute &gt;bandgap.</p> <p>The bandgap of this material is &lt;material attribute &gt;.</p> <p>This material has a &lt;material attribute &gt;bandgap.</p> <p>This material has a &lt;material attribute &gt;type of bandgap.</p> <p>This material is characterized by a &lt;material attribute &gt;bandgap.</p> <p>The bandgap of this material is specified as &lt;material attribute &gt;.</p> <p>This material exhibits a &lt;material attribute &gt;bandgap.</p> <p>The bandgap in this material is &lt;material attribute &gt;.</p> <p>The bandgap of this material is classified as &lt;material attribute &gt;.</p> <p>This is a &lt;material attribute &gt;bandgap material.</p> |
| <b>Stability</b>                | <p>This material is &lt;material attribute &gt;.</p> <p>Yes, this material is &lt;material attribute &gt;.</p> <p>The stability of this material is &lt;material attribute &gt;.</p> <p>The stability information for this material is &lt;material attribute &gt;.</p> <p>This material is &lt;material attribute &gt;under standard conditions.</p> <p>This material is &lt;material attribute &gt;.</p>                                                                                                                                                                                                                                                                                                                      |
| <b>Experimental Observation</b> | <p>The material is &lt;material attribute &gt;.</p> <p>The material is &lt;material attribute &gt;.</p>                                                                                                                                                                                                                                                                                                                                                                                                                                                                                                                                                                                                                         |
| <b>Is Magnetic</b>              | <p>The material is &lt;material attribute &gt;.</p> <p>This material is &lt;material attribute &gt;.</p> <p>Yes, this material is &lt;material attribute &gt;.</p> <p>The magnetic nature of this material is &lt;material attribute &gt;.</p> <p>This material is classified as &lt;material attribute &gt;.</p> <p>This material has &lt;material attribute &gt;properties.</p> <p>This is a &lt;material attribute &gt;material.</p>                                                                                                                                                                                                                                                                                         |
| <b>Magnetic Order</b>           | <p>The magnetic order of the material is &lt;material attribute &gt;.</p> <p>The magnetic order of this material is &lt;material attribute &gt;.</p> <p>The magnetic order of the material is specified as &lt;material attribute &gt;.</p> <p>This material has a &lt;material attribute &gt;type of magnetic order.</p> <p>The magnetic ordering of the material is &lt;material attribute &gt;.</p> <p>The magnetic arrangement in this material is &lt;material attribute &gt;.</p> <p>The type of magnetic order of this material is &lt;material attribute &gt;.</p>                                                                                                                                                      |

## Instruction Templates (property part2)

| Task                     | Instruction Template                                                                                                                                                                                                                                                                                                                                                                                                                                                             |
|--------------------------|----------------------------------------------------------------------------------------------------------------------------------------------------------------------------------------------------------------------------------------------------------------------------------------------------------------------------------------------------------------------------------------------------------------------------------------------------------------------------------|
| <b>Bandgap</b>           | <material structure>What is the bandgap of the material?<br><material structure>Can you tell me the bandgap of this material?<br><material structure>What is the energy bandgap for this material?<br><material structure>Could you specify the bandgap of the material?<br><material structure>Could you tell me the bandgap energy level of this material?                                                                                                                     |
| <b>Formation Energy</b>  | <material structure>Can you tell me the formation energy of this material?<br><material structure>Please provide the formation energy for the material.<br><material structure>What is the formation energy value for this material?<br><material structure>How much is the formation energy of this material?<br><material structure>Can you specify the formation energy of this material?                                                                                     |
| <b>Energy Above Hull</b> | <material structure>Can you tell me the energy above hull of this material?<br><material structure>Please provide the energy above hull for the material.<br><material structure>What is the energy above the hull for this material?<br><material structure>How much is the energy above hull for this material?<br><material structure>Can you specify the energy above hull of this material?<br><material structure>Could you tell me the energy above hull of the material? |



## Answer Templates (property part2)

| Task                     | Instruction Template                                                                                                                                                                                                                                                                                                                                                                                                                   |
|--------------------------|----------------------------------------------------------------------------------------------------------------------------------------------------------------------------------------------------------------------------------------------------------------------------------------------------------------------------------------------------------------------------------------------------------------------------------------|
| <b>Bandgap</b>           | The bandgap of the material is <material attribute >.<br>The bandgap of this material is <material attribute >.<br>The energy bandgap for this material is <material attribute >.<br>The bandgap of the material is specified as <material attribute >.<br>The bandgap energy level of this material is <material attribute >.                                                                                                         |
| <b>Formation Energy</b>  | The formation energy of this material is <material attribute >.<br>The formation energy for the material is <material attribute >.<br>The formation energy value for this material is <material attribute >.<br>The formation energy of this material is <material attribute >.<br>The formation energy of this material is specified as <material attribute >.                                                                        |
| <b>Energy Above Hull</b> | The energy above hull of this material is <material attribute >.<br>The energy above hull for the material is <material attribute >.<br>The energy above the hull for this material is <material attribute >.<br>The energy above hull for this material is <material attribute >.<br>The energy above hull of this material is specified as <material attribute >.<br>The energy above hull of the material is <material attribute >. |
